# Supplementary material for: Plastic microbeads from cosmetic products: an experimental study of their hydrodynamic behaviour, vertical transport and resuspension in phytoplankton and sediment aggregates
Source: Oxford University Press journal article supplement (doi:10.1525/elementa.317), 2018-01-01
Supplement: elementa-6-317-s1.xlsx [file elementa-6-317-s1.xlsx]

## Sheet: Product info&plastic %
		Product information and plastic percentage per product volume
		Product ID	Company	Product Name	Parent Company	Total product wet weight (in g)	Plastic dry weight of extracted microbeads (in g)	Plastic microbead percentage of product volume (%)
		1	Nivea	Creme Peeling Dusche	Beiersdorf AG	176	10.26	5.829
		2	Neutrogena	Visibly Clear Pink Grapefruit Tägliches Peeling	JOHNSON & JOHNSON GmbH	124	3.8	3.06452
		3	Clearasil	Ultra Akut Peeling	Reckitt Benckiser Deutschland GmbH	117	5.1	4.35897
		4	Garnier	Hautklar Aktiv	L'oreal Deutschland GmbH	126	3.3	2.61905
		5	Neutrogena	Visibly clear Fein & Matt Hautverfeinerndes Peeling	JOHNSON & JOHNSON GmbH Rival	133	7.8	5.86466
		6	Essence	Pureskin Antispot Micro Peeling	Casnova	96	2	2.08333

## Sheet: Buoyancy behavior
Product ID	Company	Buoyancy				Comments*	*for all products no particles are visible in suspension after 24 hrs and have collected either at the surface (product 1-6) or at the bottom (blue spheres product 3, freshwater)
		Freshwater		Saltwater			**ʻthe majority means that only very few particles were still visible in suspension and the large amount of particles had formed a layer of microplastic at the surface
		Groundmass	Spheres	Groundmass	Spheres
1	Nivea	positive	positive	positive	positive	Blue spheres collect immediately at the surface; the majority** of white particles collect at surface within 30 seconds
2	Neutrogena	positive	na	positive	na	White groundmass only, the majority** of plastic particles collect at surface within 2 minutes
3	Clearasil	positive	negative	positive	positive	In freshwater blue spheres seem neutral at first and sink slowly within 24 hrs; in saltwater blue spheres rise slowly to surface within 24 hours; the majority** of white particles collects at surface withing 2 minutes
4	Garnier	positive	positive	positive	positive	Dark blue spheres collect immediately at surface; the majority ** of light blue and white particles show similar buoyancy and collect at surface within 60 seconds
5	Neutrogena	positive	positive	positive	positive	Green spheres rise immediately to surface; the majority** of white plastic particles collect at surface within 60 seconds
6	Essence	positive	positive	positive	positive	Blue spheres rise immediately to surface; the majority** of white plastic particles collect at surface within 90 seconds

## Sheet: Size distribution (Nivea)
Conversion:			Microbead Size Distribution-Nivea Brand
Length in Pixel	Length in µm
255	250
1	0.980392
		Number	Length in Pixel	Length in µm	Width in Pixel	Width in µm	Comment
		1	741	726.471	438	429.412	White amorphous
		2	860	843.137	286	280.392	White amorphous
		3	502	492.157	255	250	White amorphous
		4	460	450.98	188	184.314	White amorphous
		5	442	433.333	186	182.353	White amorphous
		6	228	223.529	213	208.824	White amorphous
		7	463	453.922	211	206.863	White amorphous
		8	76	74.5098	72	70.5882	White amorphous
		9	347	340.196	217	212.745	White amorphous
		10	396	388.235	192	188.235	White amorphous
		11	283	277.451	234	229.412	White amorphous
		12	204	200	195	191.176	White amorphous
		13	768	752.941	427	418.627	White amorphous
		14	640	627.451	381	373.529	White amorphous
		15	1618	1586.27	280	274.51	White amorphous
		16	567	555.882	401	393.137	White amorphous
		17	1141	1118.63	170	166.667	White amorphous
		18	90	88.2353	104	101.961	White amorphous
		19	115	112.745	52	50.9804	White amorphous
		20	812	796.078	227	222.549	White amorphous
		21	337	330.392	159	155.882	White amorphous
		22	194	190.196	89	87.2549	White amorphous
		23	643	630.392	258	252.941	White amorphous
		24	532	521.569	496	486.275	White amorphous
		25	399	391.176	278	272.549	White amorphous
		26	438	429.412	205	200.98	White amorphous
		27	64	62.7451	42	41.1765	White amorphous
		28	711	697.059	288	282.353	White amorphous
		29	445	436.275	293	287.255	White amorphous
		30	672	658.824	231	226.471	White amorphous
		31	799	783.333	397	389.216	White amorphous
		32	563	551.961	366	358.824	White amorphous
		33	731	716.667	411	402.941	White amorphous
		34	332	325.49	138	135.294	White amorphous
		35	828	811.765	384	376.471	White amorphous
		36	584	572.549	107	104.902	White amorphous
		37	420	411.765	288	282.353	White amorphous
		38	617	604.902	351	344.118	White amorphous
		39	669	655.882	470	460.784	White amorphous
		40	683	669.608	354	347.059	White amorphous
		41	665	651.961	169	165.686	White amorphous
		42	586	574.51	373	365.686	White amorphous
		43	642	629.412	315	308.824	White amorphous
		44	258	252.941	249	244.118	White amorphous
		45	591	579.412	209	204.902	White amorphous
		46	646	633.333	255	250	White amorphous
		47	241	236.275	123	120.588	White amorphous
		48	225	220.588	112	109.804	White amorphous
		49	138	135.294	21	20.5882	White amorphous
		50	384	376.471	104	101.961	White amorphous
		51	604	592.157	225	220.588	White amorphous
		52	516	505.882	96	94.1176	White amorphous
		53	444	435.294	244	239.216	White amorphous
		54	667	653.922	341	334.314	White amorphous
		55	551	540.196	557	546.078	White amorphous
		56	154	150.98	148	145.098	White amorphous
		57	402	394.118	246	241.176	White amorphous
		58	605	593.137	254	249.02	White amorphous
		59	721	706.863	310	303.922	White amorphous
		60	633	620.588	225	220.588	White amorphous
		61	231	226.471	132	129.412	White amorphous
		62	755	740.196	352	345.098	White amorphous
		63	240	235.294	133	130.392	White amorphous
		64	512	501.961	317	310.784	White amorphous
		65	492	482.353	420	411.765	White amorphous
		66	1004	984.314	351	344.118	White amorphous
		67	635	622.549	327	320.588	White amorphous
		68	827	810.784	222	217.647	White amorphous
		69	431	422.549	89	87.2549	White amorphous
		70	687	673.529	285	279.412	White amorphous
		71	618	605.882	318	311.765	White amorphous
		72	336	329.412	219	214.706	White amorphous
		73	477	467.647	399	391.176	White amorphous
		74	291	285.294	449	440.196	White amorphous
		75	360	352.941	249	244.118	White amorphous
		76	273	267.647	255	250	White amorphous
		77	574	562.745	98	96.0784	White amorphous
		78	441	432.353	223	218.627	White amorphous
		79	592	580.392	477	467.647	White amorphous
		80	1119	1097.06	364	356.863	White amorphous
		81	618	605.882	168	164.706	White amorphous
		82	498	488.235	252	247.059	White amorphous
		83	549	538.235	411	402.941	White amorphous
		84	759	744.118	159	155.882	White amorphous
		85	527	516.667	308	301.961	White amorphous
		86	306	300	96	94.1176	White amorphous
		87	91	89.2157	61	59.8039	White amorphous
		88	381	373.529	214	209.804	White amorphous
		89	399	391.176	261	255.882	White amorphous
		90	434	425.49	225	220.588	White amorphous
		91	752	737.255	230	225.49	White amorphous
		92	743	728.431	237	232.353	White amorphous
		93	783	767.647	381	373.529	White amorphous
		94	624	611.765	382	374.51	White amorphous
		95	714	700	364	356.863	White amorphous
		96	474	464.706	286	280.392	White amorphous
		97	552	541.176	406	398.039	White amorphous
		98	543	532.353	299	293.137	White amorphous
		99	503	493.137	316	309.804	White amorphous
		100	590	578.431	271	265.686	White amorphous
		101	383	375.49	151	148.039	White amorphous
		102	124	121.569	63	61.7647	White amorphous
		103	618	605.882	483	473.529	White amorphous
		104	420	411.765	300	294.118	White amorphous
		105	622	609.804	297	291.176	White amorphous
		106	150	147.059	138	135.294	White amorphous
		107	400	392.157	345	338.235	White amorphous
		108	570	558.824	279	273.529	White amorphous
		109	515	504.902	296	290.196	White amorphous
		110	748	733.333	415	406.863	White amorphous
		111	366	358.824	479	469.608	White amorphous
		112	277	271.569	89	87.2549	White amorphous
		113	412	403.922	49	48.0392	White amorphous
		114	349	342.157	148	145.098	White amorphous
		115	476	466.667	250	245.098	White amorphous
		116	283	277.451	36	35.2941	White amorphous
		117	610	598.039	245	240.196	White amorphous
		118	196	192.157	210	205.882	White amorphous
		119	175	171.569	116	113.725	White amorphous
		120	549	538.235	166	162.745	White amorphous
		121	541	530.392	166	162.745	White amorphous
		122	579	567.647	143	140.196	White amorphous
		123	544	533.333	313	306.863	White amorphous
		124	433	424.51	352	345.098	White amorphous
		125	504	494.118	366	358.824	White amorphous
		126	401	393.137	169	165.686	White amorphous
		127	411	402.941	342	335.294	White amorphous
		128	522	511.765	420	411.765	White amorphous
		129	652	639.216	369	361.765	White amorphous
		130	424	415.686	222	217.647	White amorphous
		131	714	700	300	294.118	White amorphous
		132	224	219.608	118	115.686	White amorphous
		133	326	319.608	226	221.569	White amorphous
		134	353	346.078	18	17.6471	White amorphous
		135	757	742.157	108	105.882	White amorphous
		136	561	550	120	117.647	White amorphous
		137	324	317.647	186	182.353	White amorphous
		138	554	543.137	267	261.765	White amorphous
		139	439	430.392	99	97.0588	White amorphous
		140	237	232.353	75	73.5294	White amorphous
		141	66	64.7059	60	58.8235	White amorphous
		142	309	302.941	141	138.235	White amorphous
		143	150	147.059	90	88.2353	White amorphous
		144	252	247.059	89	87.2549	White amorphous
		145	76	74.5098	49	48.0392	White amorphous
		146	315	308.824	135	132.353	White amorphous
		147	180	176.471	168	164.706	White amorphous
		148	75	73.5294	55	53.9216	White amorphous
		149	161	157.843	51	50	White amorphous
		150	192	188.235	197	193.137	White amorphous
		Mean	482.273	472.817	239.233	234.542
		Max	1618	1586.27	557	546.078
		Min	64	62.7451	18	17.6471
		Median	484.5	475	232.5	227.941
		STDV	235.556	230.937	119.966	117.614

## Sheet: Size distribution (Neutrogena) 
Conversion:			Microbead Size Distribution-Neutrogena Pink Grapefruit Brand
Length in Pixel	Length in µm
251.106	250		Bead Number	Length in pixel	Length (µm)	Width in pixel	width (µm)	Comment
1	0.996016		1	282.466	281.341	216.375	215.513	amorphous
			2	222.91	222.022	139.46	138.904	amorphous
			3	138.13	137.58	71.12	70.8367	amorphous
			4	103.446	103.034	85.907	85.5647	amorphous
			5	157.892	157.263	136.821	136.276	amorphous
			6	143.405	142.834	87	86.6534	amorphous
			7	118.816	118.343	59.548	59.3108	amorphous
			8	107.541	107.113	72.498	72.2092	amorphous
			9	148.189	147.599	91.439	91.0747	amorphous
			10	557.556	555.335	567.563	565.302	Big Spherical
			11	164.125	163.471	130.25	129.731	amorphous
			12	249.506	248.512	150.748	150.147	amorphous
			13	100.623	100.222	87.207	86.8596	amorphous
			14	188.452	187.701	161.555	160.911	amorphous
			15	197.226	196.44	170.473	169.794	amorphous
			16	294.871	293.696	214.516	213.661	amorphous
			17	232.863	231.935	191.366	190.604	amorphous
			18	150.659	150.059	89.045	88.6902	amorphous
			19	180.1	179.382	128.86	128.347	amorphous
			20	161.22	160.578	89.095	88.74	amorphous
			21	217.867	216.999	157.892	157.263	amorphous
			22	215.353	214.495	175.801	175.101	amorphous
			23	120.934	120.452	81.609	81.2839	amorphous
			24	182.779	182.051	148.946	148.353	amorphous
			25	149.218	148.624	147.122	146.536	amorphous
			26	133.795	133.262	123.693	123.2	amorphous
			27	219.021	218.148	147.763	147.174	amorphous
			28	120.075	119.597	102.044	101.637	amorphous
			29	237.626	236.679	174.026	173.333	amorphous
			30	142.271	141.704	101.514	101.11	amorphous
			31	106.827	106.401	90.449	90.0886	amorphous
			32	156.029	155.407	151.7	151.096	amorphous
			33	173.404	172.713	103.576	103.163	amorphous
			34	148.189	147.599	147.733	147.144	amorphous
			35	115.918	115.456	115.526	115.066	amorphous
			36	170.812	170.131	95.294	94.9143	amorphous
			37	114.158	113.703	99.725	99.3277	amorphous
			38	212.047	211.202	119.549	119.073	amorphous
			39	84.906	84.5677	79.881	79.5627	amorphous
			40	231.019	230.099	165.68	165.02	amorphous
			41	181.221	180.499	114.237	113.782	amorphous
			42	185.952	185.211	129.139	128.625	amorphous
			43	147.031	146.445	123.037	122.547	amorphous
			44	126.89	126.384	117.614	117.145	amorphous
			45	130.25	129.731	109.202	108.767	amorphous
			46	94.236	93.8606	81.222	80.8984	amorphous
			47	187.542	186.795	102.044	101.637	amorphous
			48	224.439	223.545	197.773	196.985	amorphous
			49	141.128	140.566	75	74.7012	amorphous
			50	173.819	173.126	160.1	159.462	amorphous
			51	207.781	206.953	177	176.295	amorphous
			52	216.603	215.74	135.831	135.29	amorphous
			53	232.298	231.373	98.407	98.0149	amorphous
			54	108.374	107.942	92.418	92.0498	amorphous
			55	88.589	88.2361	65.795	65.5329	amorphous
			56	294.932	293.757	264.273	263.22	amorphous
			57	150.659	150.059	127.279	126.772	amorphous
			58	639.063	636.517	618.007	615.545	Big Spherical
			59	411.274	409.635	399.045	397.455	Big Spherical
			60	181.246	180.524	128.16	127.649	amorphous
			61	123	122.51	240.15	239.193	amorphous
			62	123.693	123.2	218.197	217.328	amorphous
			63	184.859	184.123	91.586	91.2211	amorphous
			64	191.859	191.095	101.514	101.11	amorphous
			65	169.317	168.642	150.479	149.879	amorphous
			66	201.599	200.796	153.029	152.419	amorphous
			67	154.871	154.254	131.214	130.691	amorphous
			68	165.245	164.587	147.122	146.536	amorphous
			69	196.471	195.688	122.413	121.925	amorphous
			70	160.381	159.742	99.045	98.6504	amorphous
			71	118.87	118.396	90.05	89.6912	amorphous
			72	218.708	217.837	113.644	113.191	amorphous
			73	182.367	181.64	177.162	176.456	amorphous
			74	90.275	89.9153	57.445	57.2161	amorphous
			75	115.005	114.547	114.89	114.432	amorphous
			76	117.656	117.187	76.321	76.0169	amorphous
			77	151.908	151.303	143.562	142.99	amorphous
			78	114.237	113.782	56.921	56.6942	amorphous
			79	597.03	594.651	582.193	579.874	amorphous
			80	138.13	137.58	108.167	107.736	amorphous
			81	178.421	177.71	150.479	149.879	amorphous
			82	109.49	109.054	74.126	73.8307	amorphous
			83	417.011	415.35	414	412.351	Big Spherical
			84	243.758	242.787	186.869	186.125	amorphous
			85	158.319	157.688	94.154	93.7789	amorphous
			86	126.606	126.102	111.364	110.92	amorphous
			87	102.616	102.207	81.609	81.2839	amorphous
			88	174.645	173.949	162.111	161.465	amorphous
			89	225.559	224.66	115.296	114.837	amorphous
			90	163.025	162.375	141.032	140.47	amorphous
			91	207.022	206.197	120.037	119.559	amorphous
			92	165.327	164.668	137.674	137.125	amorphous
			93	112.61	112.161	61.847	61.6006	amorphous
			94	132.034	131.508	125.929	125.427	amorphous
			95	114.355	113.899	84	83.6653	amorphous
			96	219.021	218.148	195.023	194.246	amorphous
			97	117.154	116.687	57.315	57.0867	amorphous
			98	222.02	221.135	174	173.307	amorphous
			99	126.57	126.066	126.321	125.818	amorphous
			100	123	122.51	93.193	92.8217	amorphous
			101	162.444	161.797	96.047	95.6643	amorphous
			102	141.223	140.66	102.396	101.988	amorphous
			103	156.029	155.407	135.133	134.595	amorphous
			104	171.105	170.423	138.293	137.742	amorphous
			105	129	128.486	99	98.6056	amorphous
			106	264.273	263.22	84.054	83.7191	amorphous
			107	147.092	146.506	114.355	113.899	amorphous
			108	205.341	204.523	121.565	121.081	amorphous
			109	261.155	260.115	201.022	200.221	amorphous
			110	82.377	82.0488	75.06	74.761	amorphous
			111	129.035	128.521	120.15	119.671	amorphous
			112	183.393	182.662	120	119.522	amorphous
			113	183	182.271	153.118	152.508	amorphous
			114	111.364	110.92	79.429	79.1125	amorphous
			115	240.075	239.119	147.489	146.901	amorphous
			116	189.855	189.099	188.404	187.653	amorphous
			117	95.294	94.9143	93.693	93.3197	amorphous
			118	191.672	190.908	174.155	173.461	amorphous
			119	187.182	186.436	140.52	139.96	amorphous
			120	187.182	186.436	148.098	147.508	amorphous
			121	183.211	182.481	172.676	171.988	amorphous
			122	183.393	182.662	173.188	172.498	amorphous
			123	144	143.426	84.853	84.5149	amorphous
			124	183.883	183.15	136.029	135.487	amorphous
			125	177.102	176.396	120.15	119.671	amorphous
			126	95.859	95.4771	63.071	62.8197	amorphous
			127	119.549	119.073	83.57	83.2371	amorphous
			128	119.474	118.998	83.355	83.0229	amorphous
			129	168.908	168.235	90.25	89.8904	amorphous
			130	110.635	110.194	87	86.6534	amorphous
			131	135	134.462	129.418	128.902	amorphous
			132	192.211	191.445	96.607	96.2221	amorphous
			133	180.1	179.382	171	170.319	amorphous
			134	172.363	171.676	89.095	88.74	amorphous
			135	123.037	122.547	105.683	105.262	amorphous
			136	168	167.331	126	125.498	amorphous
			137	163.768	163.116	77.885	77.5747	amorphous
			138	118.338	117.867	104.657	104.24	amorphous
			139	120.487	120.007	97.165	96.7779	amorphous
			140	173.118	172.428	167.194	166.528	amorphous
			141	123.438	122.946	90.2	89.8406	amorphous
			142	218.403	217.533	198.295	197.505	amorphous
			143	120	119.522	102.044	101.637	amorphous
			144	154.289	153.674	111.364	110.92	amorphous
			145	181.395	180.672	133.795	133.262	amorphous
			146	465.039	463.186	453	451.195	Big Spherical
			147	147	146.414	117.154	116.687	amorphous
			148	255.863	254.844	168.027	167.358	amorphous
			149	189.024	188.271	156	155.378	amorphous
			150	138	137.45	135.033	134.495	amorphous
			Median	163.947	163.293	120.858	120.376
			Max	639.063	636.517	618.007	615.545
			Min	82.377	82.0488	56.921	56.6942
			Average	177.817	177.109	139.488	138.932
			STDV	84.2797	83.944	86.6143	86.2692

## Sheet: Size distribution (Clearasil)
Conversion:			Microbead Size Distribution-Clearasil Brand
Length in Pixel	Length in µm
237	250
1	1.05485		Number	Length in Pixel	Length in µm	Width in Pixel	Width in µm	Comment
			1	166	175.105	55	58.0169	White amorphous bead
			2	136	143.46	63	66.4557	White amorphous bead
			3	43	45.3586	55	58.0169	White amorphous bead
			4	63	66.4557	48	50.6329	White amorphous bead
			5	68	71.73	50	52.7426	White amorphous bead
			6	89	93.8819	47	49.5781	White amorphous bead
			7	91	95.9916	44	46.4135	White amorphous bead
			8	153	161.392	84	88.6076	White amorphous bead
			9	214	225.738	118	124.473	White amorphous bead
			10	302	318.565	99	104.43	White amorphous bead
			11	153	161.392	136	143.46	White amorphous bead
			12	106	111.814	48	50.6329	White amorphous bead
			13	78	82.2785	69	72.7848	White amorphous bead
			14	65	68.5654	48	50.6329	White amorphous bead
			15	104	109.705	92	97.0464	White amorphous bead
			16	120	126.582	72	75.9494	White amorphous bead
			17	162	170.886	57	60.1266	White amorphous bead
			18	323	340.717	144	151.899	White amorphous bead
			19	152	160.338	74	78.0591	White amorphous bead
			20	139	146.624	69	72.7848	White amorphous bead
			21	147	155.063	67	70.6751	White amorphous bead
			22	134	141.35	85	89.6624	White amorphous bead
			23	267	281.646	144	151.899	White amorphous bead
			24	248	261.603	110	116.034	White amorphous bead
			25	351	370.253	129	136.076	White amorphous bead
			26	154	162.447	125	131.857	White amorphous bead
			27	106	111.814	44	46.4135	White amorphous bead
			28	573	604.43	20	21.097	White amorphous bead
			29	200	210.97	53	55.9072	White amorphous bead
			30	183	193.038	63	66.4557	White amorphous bead
			31	88	92.827	61	64.346	White amorphous bead
			32	133	140.295	48	50.6329	White amorphous bead
			33	342	360.759	221	233.122	White amorphous bead
			34	203	214.135	165	174.051	White amorphous bead
			35	21	22.1519	10	10.5485	White amorphous bead
			36	96	101.266	85	89.6624	White amorphous bead
			37	142	149.789	90	94.9367	White amorphous bead
			38	152	160.338	35	36.9198	White amorphous bead
			39	80	84.3882	52	54.8523	White amorphous bead
			40	144	151.899	95	100.211	White amorphous bead
			41	213	224.684	23	24.2616	White amorphous bead
			42	244	257.384	133	140.295	White amorphous bead
			43	198	208.861	80	84.3882	White amorphous bead
			44	155	163.502	63	66.4557	White amorphous bead
			45	102	107.595	50	52.7426	White amorphous bead
			46	174	183.544	121	127.637	White amorphous bead
			47	164	172.996	99	104.43	White amorphous bead
			48	290	305.907	143	150.844	White amorphous bead
			49	108	113.924	111	117.089	White amorphous bead
			50	129	136.076	71	74.8945	White amorphous bead
			51	138	145.57	76	80.1688	White amorphous bead
			52	150	158.228	154	162.447	White amorphous bead
			53	394	415.612	29	30.5907	White amorphous bead
			54	69	72.7848	54	56.962	White amorphous bead
			55	504	531.646	198	208.861	White amorphous bead
			56	55	58.0169	43	45.3586	White amorphous bead
			57	59	62.2363	41	43.2489	White amorphous bead
			58	62	65.4008	29	30.5907	White amorphous bead
			59	88	92.827	39	41.1392	White amorphous bead
			60	34	35.865	28	29.5359	White amorphous bead
			61	24	25.3165	18	18.9873	White amorphous bead
			62	21	22.1519	16	16.8776	White amorphous bead
			63	37	39.0295	19	20.0422	White amorphous bead
			64	44	46.4135	41	43.2489	White amorphous bead
			65	49	51.6878	40	42.1941	White amorphous bead
			66	285	300.633	196	206.751	White amorphous bead
			67	192	202.532	102	107.595	White amorphous bead
			68	437	460.97	88	92.827	White amorphous bead
			69	418	440.928	91	95.9916	White amorphous bead
			70	280	295.359	41	43.2489	White amorphous bead
			71	103	108.65	55	58.0169	White amorphous bead
			72	157	165.612	49	51.6878	White amorphous bead
			73	133	140.295	47	49.5781	White amorphous bead
			74	147	155.063	33	34.8101	White amorphous bead
			75	161	169.831	28	29.5359	White amorphous bead
			76	110	116.034	56	59.0717	White amorphous bead
			77	256	270.042	124	130.802	White amorphous bead
			78	232	244.726	105	110.759	White amorphous bead
			79	203	214.135	155	163.502	White amorphous bead
			80	198	208.861	143	150.844	White amorphous bead
			81	239	252.11	82	86.4979	White amorphous bead
			82	67	70.6751	55	58.0169	White amorphous bead
			83	69	72.7848	43	45.3586	White amorphous bead
			84	63	66.4557	23	24.2616	White amorphous bead
			85	61	64.346	35	36.9198	White amorphous bead
			86	55	58.0169	41	43.2489	White amorphous bead
			87	200	210.97	84	88.6076	White amorphous bead
			88	96	101.266	66	69.6203	White amorphous bead
			89	54	56.962	36	37.9747	White amorphous bead
			90	286	301.688	135	142.405	White amorphous bead
			91	72	75.9494	61	64.346	White amorphous bead
			92	81	85.443	55	58.0169	White amorphous bead
			93	188	198.312	104	109.705	White amorphous bead
			94	142	149.789	98	103.376	White amorphous bead
			95	139	146.624	83	87.5527	White amorphous bead
			96	192	202.532	120	126.582	White amorphous bead
			97	201	212.025	139	146.624	White amorphous bead
			98	213	224.684	122	128.692	White amorphous bead
			99	200	210.97	143	150.844	White amorphous bead
			100	241	254.219	121	127.637	White amorphous bead
			101	237	250	108	113.924	White amorphous bead
			102	245	258.439	165	174.051	White amorphous bead
			103	236	248.945	154	162.447	White amorphous bead
			104	207	218.354	148	156.118	White amorphous bead
			105	209	220.464	188	198.312	White amorphous bead
			106	278	293.249	155	163.502	White amorphous bead
			107	288	303.797	143	150.844	White amorphous bead
			108	267	281.646	198	208.861	White amorphous bead
			109	243	256.329	202	213.08	White amorphous bead
			110	251	264.768	183	193.038	White amorphous bead
			111	205	216.245	29	30.5907	White amorphous bead
			112	251	264.768	34	35.865	White amorphous bead
			113	231	243.671	28	29.5359	White amorphous bead
			114	306	322.785	289	304.852	White amorphous bead
			115	88	92.827	65	68.5654	White amorphous bead
			116	62	65.4008	58	61.1814	White amorphous bead
			117	59	62.2363	45	47.4684	White amorphous bead
			118	79	83.3333	63	66.4557	White amorphous bead
			119	71	74.8945	64	67.5105	White amorphous bead
			120	66	69.6203	61	64.346	White amorphous bead
			121	68	71.73	62	65.4008	White amorphous bead
			122	265	279.536	153	161.392	White amorphous bead
			123	293	309.072	238	251.055	White amorphous bead
			124	196	206.751	173	182.489	White amorphous bead
			125	23	24.2616	14	14.7679	White amorphous bead
			126	27	28.481	11	11.6034	White amorphous bead
			127	169	178.27	161	169.831	White amorphous bead
			128	159	167.722	142	149.789	White amorphous bead
			129	298	314.346	203	214.135	White amorphous bead
			130	356	375.527	95	100.211	White amorphous bead
			131	342	360.759	274	289.03	White amorphous bead
			132	184	194.093	103	108.65	White amorphous bead
			133	198	208.861	103	108.65	White amorphous bead
			134	185	195.148	111	117.089	White amorphous bead
			135	27	28.481	22	23.2068	White amorphous bead
			136	79	83.3333	68	71.73	White amorphous bead
			137	189	199.367	101	106.54	White amorphous bead
			138	438	462.025	357	376.582	White amorphous bead
			139	186	196.203	137	144.515	White amorphous bead
			140	164	172.996	72	75.9494	White amorphous bead
			141	472	497.89	472	497.89	Blue spherical bead
			142	411	433.544	411	433.544	Blue spherical bead
			143	423	446.203	423	446.203	Blue spherical bead
			144	461	486.287	461	486.287	Blue spherical bead
			145	502	529.536	502	529.536	Blue spherical bead
			146	292	308.017	292	308.017	Blue spherical bead
			147	498	525.316	498	525.316	Blue spherical bead
			148	417	439.873	417	439.873	Blue spherical bead
			149	576	607.595	576	607.595	Blue spherical bead
			150	456	481.013	456	481.013	Blue spherical bead
			Median	189.333	199.719	115.6	121.941
			Max	576	607.595	576	607.595
			Min	21	22.1519	10	10.5485
			Average	164	172.996	83.5	88.0802
			Standard Diviation	123.822	130.614	108.72	114.683

## Sheet: Size distribution (Garnier)
Conversion:			Microbead Size Distribution-Ganier Brand
Length in pixel	L ength in µm
246	250
1	1.01626
		Number	Width in Pixel	Length in µm	Length in pixel	Width in µm	Comment
		1	381	387.195	372.435	378.491	Dark Blue Bead
		2	436.281	443.375	330.409	335.782	amorphous
		3	336.482	341.953	210	213.415	amorphous
		4	361.011	366.881	228.178	231.888	amorphous
		5	223.394	227.026	114.826	116.693	Light Blue elipse
		6	234.077	237.883	168.107	170.84	amorphous
		7	124.852	126.882	122.119	124.105	amorphous
		8	305.5	310.467	197.294	200.502	amorphous
		9	258.94	263.15	193.215	196.357	amorphous
		10	167.92	170.65	155.682	158.213	amorphous
		11	140.616	142.902	123.146	125.148	amorphous
		12	290.396	295.118	116.846	118.746	amorphous
		13	186.387	189.418	174.413	177.249	amorphous
		14	234.327	238.137	209.571	212.979	amorphous
		15	293.019	297.784	209.571	212.979	amorphous
		16	179.725	182.647	169.838	172.6	amorphous
		17	169.838	172.6	135.93	138.14	amorphous
		18	304.245	309.192	202.428	205.72	amorphous
		19	345.326	350.941	212.492	215.947	Light Blue Elipse
		20	330.341	335.712	207.022	210.388	Light Blue Elipse
		21	357.994	363.815	243	246.951	Light Blue Elipse
		22	188.809	191.879	169.068	171.817	amorphous
		23	170.262	173.03	142.271	144.584	amorphous
		24	317.717	322.883	254.558	258.697	amorphous
		25	317.547	322.71	126.178	128.23	amorphous
		26	136.854	139.079	99.905	101.529	amorphous
		27	252.517	256.623	232.398	236.177	amorphous
		28	254.594	258.734	188.809	191.879	amorphous
		29	246.018	250.018	243.074	247.026	amorphous
		30	191.107	194.214	148.977	151.399	amorphous
		31	334.819	340.263	201.693	204.973	amorphous
		32	75	76.2195	70.292	71.435	amorphous
		33	341.855	347.414	193.145	196.286	Light Blue Elipse
		34	346.808	352.447	260.776	265.016	Light Blue Elipse
		35	108.374	110.136	87	88.4146	Dark Blue Sphere
		36	252.517	256.623	237.966	241.835	amorphous
		37	204.198	207.518	127.35	129.421	amorphous
		38	135.831	138.04	114.865	116.733	amorphous
		39	330.953	336.334	193.052	196.191	amorphous
		40	240.3	244.207	105.374	107.087	amorphous
		41	172.884	175.695	98.27	99.8679	Light Blue Elipse
		42	317.277	322.436	132.612	134.768	Light Blue Elipse
		43	344.073	349.668	215.102	218.6	Light Blue Elipse
		44	125.929	127.977	109.49	111.27	Dark Blue Sphere
		45	136.36	138.577	93.048	94.561	Light Blue Elipse
		46	342.184	347.748	331.307	336.694	Dark Blue Sphere
		47	140.456	142.74	78.746	80.0264	amorphous
		48	145.121	147.481	90.25	91.7175	amorphous
		49	198.658	201.888	168.134	170.868	amorphous
		50	255.071	259.218	195.092	198.264	amorphous
		51	201.358	204.632	186.218	189.246	amorphous
		52	260.776	265.016	152.765	155.249	amorphous
		53	175.57	178.425	158.405	160.981	amorphous
		54	240.019	243.922	147.489	149.887	amorphous
		55	144	146.341	141.128	143.423	amorphous
		56	123.911	125.926	117.154	119.059	amorphous
		57	177	179.878	174.026	176.856	amorphous
		58	165	167.683	150.03	152.47	amorphous
		59	240.019	243.922	147	149.39	amorphous
		60	338.163	343.662	248.566	252.608	amorphous
		61	217.867	221.41	126.036	128.085	amorphous
		62	337.35	342.835	185.151	188.162	Blue Bead
		63	264.715	269.019	249.578	253.636	Blue Bead
		64	246.91	250.925	173.404	176.224	amorphous
		65	349.407	355.088	123.037	125.038	amorphous
		66	181.32	184.268	78.746	80.0264	amorphous
		67	158.319	160.893	99.725	101.347	amorphous
		68	153.792	156.293	80.777	82.0904	amorphous
		69	243.906	247.872	193.052	196.191	amorphous
		70	213.338	216.807	152.322	154.799	amorphous
		71	147.733	150.135	141.032	143.325	amorphous
		72	282.207	286.796	275.804	280.289	amorphous
		73	396.659	403.109	240.786	244.701	amorphous
		74	382.321	388.538	262.393	266.66	amorphous
		75	377.976	384.122	203.823	207.137	amorphous
		76	229.26	232.988	93.048	94.561	amorphous
		77	208.019	211.401	196.38	199.573	amorphous
		78	183.883	186.873	109.202	110.978	amorphous
		79	201.804	205.085	186.507	189.54	amorphous
		80	181.593	184.546	129.973	132.086	amorphous
		81	246.658	250.669	167.356	170.077	Light Blue Elipse
		82	284.793	289.424	244.201	248.172	Dark Blue Sphere
		83	546.297	555.18	328.702	334.047	amorphous
		84	229.593	233.326	170.394	173.165	amorphous
		85	192.772	195.907	94.202	95.7337	amorphous
		86	232.263	236.04	151.344	153.805	amorphous
		87	282.016	286.602	279.016	283.553	amorphous
		88	202.094	205.38	196.128	199.317	amorphous
		89	155.769	158.302	132.544	134.699	amorphous
		90	136.953	139.18	80.777	82.0904	amorphous
		91	254.788	258.931	141.032	143.325	amorphous
		92	183.883	186.873	90.449	91.9197	amorphous
		93	150	152.439	138.033	140.277	amorphous
		94	282.574	287.169	198.091	201.312	amorphous
		95	192.275	195.401	172.285	175.086	amorphous
		96	171.421	174.208	141.128	143.423	amorphous
		97	255.282	259.433	120	121.951	Light Blue Elipse
		98	186.724	189.76	95.483	97.0356	amorphous
		99	317.277	322.436	213.928	217.407	amorphous
		100	173.118	175.933	97.949	99.5417	amorphous
		101	141	143.293	129	131.098	amorphous
		102	401.429	407.956	229.965	233.704	amorphous
		103	150.03	152.47	93.434	94.9533	amorphous
		104	156.029	158.566	117.038	118.941	amorphous
		105	296.287	301.105	133.154	135.319	amorphous
		106	288.016	292.699	159	161.585	Light Blue Elipse
		107	294.015	298.796	156.115	158.653	Light Blue Elipse
		108	288	292.683	176.082	178.945	amorphous
		109	123.146	125.148	120.15	122.104	amorphous
		110	327.124	332.443	235.342	239.169	amorphous
		111	201.358	204.632	142.524	144.841	amorphous
		112	159	161.585	120	121.951	amorphous
		113	231.7	235.467	174.103	176.934	amorphous
		114	78.746	80.0264	71.561	72.7246	amorphous
		115	400.621	407.135	261.964	266.224	amorphous
		116	266.595	270.93	147.58	149.98	amorphous
		117	174.026	176.856	134.063	136.243	amorphous
		118	275.772	280.256	271.347	275.759	amorphous
		119	294.015	298.796	156.115	158.653	amorphous
		120	232.418	236.197	163.686	166.348	Light Blue Elipse
		121	99.408	101.024	75.538	76.7663	Light Blue Elipse
		122	246.018	250.018	144.125	146.468	Light Blue Elipse
		123	147.489	149.887	103.576	105.26	amorphous
		124	225.499	229.166	177.102	179.982	amorphous
		125	169.068	171.817	134.466	136.652	amorphous
		126	285	289.634	207.933	211.314	amorphous
		127	216.021	219.534	138.521	140.773	amorphous
		128	228.65	232.368	115.118	116.99	amorphous
		129	153.118	155.608	138	140.244	amorphous
		130	384.422	390.673	231.019	234.775	amorphous
		131	216.187	219.702	186.869	189.908	amorphous
		132	194.283	197.442	129	131.098	amorphous
		133	209.442	212.848	97.673	99.2612	amorphous
		134	254.275	258.41	174.542	177.38	Light Blue Elipse
		135	168.027	170.759	148.492	150.907	Dark Blue Sphere
		136	101.203	102.849	67.082	68.1728	amorphous
		137	316.425	321.57	199.472	202.715	amorphous
		138	145.121	147.481	120.037	121.989	amorphous
		139	256.531	260.702	182.187	185.149	amorphous
		140	307.774	312.778	217.329	220.863	amorphous
		141	244.035	248.003	135	137.195	amorphous
		142	202.094	205.38	198.023	201.243	amorphous
		143	294.245	299.029	201.246	204.518	amorphous
		144	336.99	342.47	181.816	184.772	Light Blue Elipse
		145	229.965	233.704	221.472	225.073	Light Blue Elipse
		146	251.177	255.261	186.797	189.834	amorphous
		147	254.558	258.697	174.026	176.856	amorphous
		148	300	304.878	195.208	198.382	amorphous
		149	294.245	299.029	228	231.707	amorphous
		150	192.023	195.145	85.802	87.1972	amorphous
		Median	232.341	236.118	158.702	161.283
		Max	546.297	555.18	372.435	378.491
		Min	75	76.2195	67.082	68.1728
		Average	237.928	241.796	166.464	169.171
		STDV	81.4057	82.7293	58.5504	59.5024

## Sheet: Size distribution (Neutrogena)
Conversion:			Microbead Size Distribution-Neutrogena Visibly clear Fein & Matt Hautverfeinerndes Peeling Brand
Length in Pixel	Length in µm
253.98	250
1	0.984329
		Bead Number	Length in pixel	Length (µm)	Width in pixel	Width (µm)	Comment
		1	227.702	224.134	164.069	161.498	amorphous
		2	50.2233	49.4363	115.613	113.802	amorphous
		3	139.715	137.526	177.245	174.467	amorphous
		4	132.324	130.25	138.343	136.175	amorphous
		5	139.418	137.233	119.326	117.456	amorphous
		6	199.411	196.286	158.171	155.693	amorphous
		7	112.559	110.796	168.795	166.15	amorphous
		8	202.239	199.07	187.148	184.215	amorphous
		9	141.443	139.227	22.0872	21.7411	amorphous
		10	56.938	56.0458	166.528	163.919	amorphous
		11	84.1196	82.8014	124.299	122.351	amorphous
		12	190.021	187.043	187.322	184.386	amorphous
		13	141.856	139.633	110.123	108.397	amorphous
		14	79.6279	78.3801	102.08	100.481	amorphous
		15	116.178	114.358	155.825	153.383	amorphous
		16	167.833	165.203	60.0498	59.1088	amorphous
		17	87.1986	85.8322	105.182	103.533	amorphous
		18	193.255	190.226	172.442	169.74	amorphous
		19	97.1128	95.591	117.968	116.12	amorphous
		20	227.98	224.408	163.145	160.588	amorphous
		21	102.198	100.596	145.353	143.075	amorphous
		22	198.507	195.396	119.86	117.982	amorphous
		23	86.6004	85.2433	63.2047	62.2142	amorphous
		24	105.775	104.117	133.292	131.203	amorphous
		25	67.676	66.6155	35.9416	35.3784	amorphous
		26	161.785	159.249	126.535	124.552	amorphous
		27	182.572	179.711	132.378	130.303	amorphous
		28	156.039	153.594	143.869	141.614	amorphous
		29	132.591	130.514	170.756	168.08	amorphous
		30	175.022	172.279	186.045	183.129	amorphous
		31	175.638	172.885	150.428	148.071	amorphous
		32	181.729	178.882	119.102	117.235	amorphous
		33	173.343	170.626	177.028	174.254	amorphous
		34	233.364	229.707	118.875	117.012	amorphous
		35	90.5334	89.1147	24.8362	24.447	amorphous
		36	187.601	184.661	42.1835	41.5225	amorphous
		37	95.8287	94.327	166.073	163.47	amorphous
		38	73.1629	72.0164	102.877	101.265	amorphous
		39	167.817	165.187	163.091	160.535	amorphous
		40	137.327	135.175	56.9706	56.0778	amorphous
		41	138.993	136.815	114.233	112.443	amorphous
		42	178.417	175.621	127.191	125.197	amorphous
		43	199.435	196.31	27.3425	26.914	amorphous
		44	117.942	116.094	124.657	122.704	amorphous
		45	178.43	175.634	82.5227	81.2295	amorphous
		46	130.735	128.686	30.2719	29.7975	amorphous
		47	213.334	209.991	103.758	102.132	amorphous
		48	211.586	208.27	54.1492	53.3007	amorphous
		49	99.7496	98.1865	42.555	41.8881	amorphous
		50	169.011	166.363	56.3175	55.435	amorphous
		51	162.956	160.403	46.468	45.7398	amorphous
		52	154.903	152.476	53.5751	52.7356	amorphous
		53	218.769	215.34	29.123	28.6666	amorphous
		54	101.367	99.7786	128.078	126.071	amorphous
		55	111.706	109.956	69.0718	67.9894	amorphous
		56	73.1276	71.9817	111.946	110.191	amorphous
		57	232.327	228.686	138.092	135.928	amorphous
		58	175.237	172.491	105.352	103.701	amorphous
		59	143.016	140.775	111.479	109.732	amorphous
		60	174.028	171.3	96.3456	94.8358	amorphous
		61	155.675	153.235	42.6967	42.0276	amorphous
		62	175.578	172.827	103.89	102.262	amorphous
		63	155.514	153.077	164.451	161.874	amorphous
		64	189.883	186.907	167.946	165.314	amorphous
		65	151.364	148.992	67.1392	66.0871	amorphous
		66	242.779	238.974	56.813	55.9227	amorphous
		67	92.4233	90.975	116.352	114.528	amorphous
		68	70.5249	69.4197	128.932	126.912	amorphous
		69	71.2813	70.1643	91.6438	90.2077	amorphous
		70	62.3367	61.3599	56.3979	55.5141	amorphous
		71	128.488	126.475	180.305	177.479	amorphous
		72	136.984	134.838	35.7059	35.1464	amorphous
		73	120.968	119.073	39.6535	39.0321	amorphous
		74	198.12	195.015	45.7209	45.0044	amorphous
		75	171.812	169.12	49.7989	49.0185	amorphous
		76	199.764	196.634	125.7	123.73	amorphous
		77	230.974	227.354	117.809	115.963	amorphous
		78	238.712	234.971	30.697	30.216	amorphous
		79	87.2535	85.8862	177.511	174.729	amorphous
		80	76.9416	75.7359	143.686	141.435	amorphous
		81	185.076	182.175	145.22	142.944	amorphous
		82	68.2011	67.1324	32.5886	32.0779	amorphous
		83	151.929	149.548	165.694	163.097	amorphous
		84	152.887	150.491	178.046	175.256	amorphous
		85	217.061	213.66	186.394	183.474	amorphous
		86	144.061	141.804	165.443	162.85	amorphous
		87	126.331	124.351	153.188	150.788	amorphous
		88	180.258	177.433	107.734	106.046	amorphous
		89	193.804	190.767	51.6596	50.8501	amorphous
		90	150.89	148.526	88.5644	87.1765	amorphous
		91	117.456	115.616	44.3665	43.6713	amorphous
		92	79.0995	77.86	27.1586	26.733	amorphous
		93	163.702	161.137	178.837	176.034	amorphous
		94	100.856	99.2757	72.3181	71.1848	amorphous
		95	58.6241	57.7054	71.3542	70.236	amorphous
		96	196.457	193.379	77.6004	76.3844	amorphous
		97	97.1004	95.5788	100	98.4333	amorphous
		98	135.826	133.698	130.249	128.208	amorphous
		99	183.432	180.558	26.2131	25.8023	amorphous
		100	119.69	117.815	162.649	160.1	amorphous
		101	192.85	189.828	115.358	113.551	amorphous
		102	126.573	124.59	164.635	162.055	amorphous
		103	182.583	179.722	80.0958	78.8407	amorphous
		104	186.585	183.661	96.4865	94.9745	amorphous
		105	135.807	133.679	31.058	30.5713	amorphous
		106	53.7981	52.9551	51.577	50.7688	amorphous
		107	114.186	112.397	132.689	130.61	amorphous
		108	132.316	130.243	77.2484	76.0379	amorphous
		109	102.433	100.827	172.047	169.351	amorphous
		110	88.2284	86.8458	41.7319	41.0779	amorphous
		111	209.414	206.132	187.066	184.134	amorphous
		112	133.405	131.314	112.177	110.419	amorphous
		113	222.228	218.745	140.055	137.86	amorphous
		114	125.889	123.917	188.915	185.955	amorphous
		115	199.208	196.087	70.0708	68.9728	amorphous
		116	126.978	124.988	91.2253	89.7958	amorphous
		117	206.852	203.61	99.6283	98.0671	amorphous
		118	196.485	193.406	149.581	147.237	amorphous
		119	123.215	121.284	158.64	156.154	amorphous
		120	91.9077	90.4675	38.737	38.13	amorphous
		121	203.339	200.153	51.7455	50.9346	amorphous
		122	234.165	230.496	82.059	80.7731	amorphous
		123	113.548	111.768	31.4697	30.9766	amorphous
		124	180.225	177.401	109.155	107.444	amorphous
		125	135.097	132.98	78.0868	76.8631	amorphous
		126	211.699	208.382	51.3367	50.5322	amorphous
		127	199.158	196.037	56.8941	56.0025	amorphous
		128	82.4472	81.1552	173.161	170.447	amorphous
		129	217.224	213.82	134.79	132.678	amorphous
		130	242.035	238.242	100.234	98.6635	amorphous
		131	149.798	147.451	174.326	171.594	amorphous
		132	221.55	218.079	39.3699	38.753	amorphous
		133	164.077	161.506	146.506	144.21	amorphous
		134	80.022	78.768	144.957	142.685	amorphous
		135	88.7734	87.3823	115.831	114.016	amorphous
		136	128.949	126.928	52.7604	51.9336	amorphous
		137	195.249	192.189	121.734	119.827	amorphous
		138	210.163	206.87	72.0895	70.9598	amorphous
		139	532	523.663	541	532.522	Big spherical green
		140	111.794	110.042	57.5045	56.6034	amorphous
		141	153.608	151.201	171.455	168.769	amorphous
		142	67.4504	66.3934	33.9326	33.4009	amorphous
		143	71.6709	70.5478	62.4953	61.516	amorphous
		144	76.4408	75.2429	30.977	30.4916	amorphous
		145	181.659	178.812	95.7676	94.2669	amorphous
		146	146.064	143.775	24.2183	23.8388	amorphous
		147	86.8038	85.4435	171.831	169.138	amorphous
		148	564	555.162	588	578.786	Big spherical green
		149	78.636	77.4037	37.5929	37.0038	amorphous
		150	60.665	59.7143	73.3303	72.1812	amorphous
		Median	147.931	145.613	110.801	109.064	amorphous
		Max	564	555.162	588	578.786	amorphous
		Min	50.2233	49.4363	22.0872	21.7411	amorphous
		Average	153.849	151.438	113.723	111.941	amorphous
		STDV	68.5807	67.506	72.9306	71.7878

## Sheet: Size distribution (Essence)
Conversion:			Microbead Size Distribution-Essence Brand
Length in Pixel	Length in µm
262.106	250
1	0.954198
		Bead Number	Length in pixel	Length (µm)	Width in pixel	Width (µm)	Comment
		1	200.59	190.561	67.8857	64.7764	amorphous
		2	43.2521	41.0895	254.592	242.931	amorphous
		3	408.363	387.944	62.7293	59.8562	amorphous
		4	426.369	405.05	71.4336	68.1618	amorphous
		5	232.09	220.485	206.495	197.037	amorphous
		6	231.4	219.83	79.019	75.3998	amorphous
		7	166.544	158.217	295.445	281.913	amorphous
		8	407.223	386.862	295.264	281.741	amorphous
		9	180.038	171.036	266.732	254.515	amorphous
		10	69.5948	66.1151	94.9596	90.6103	amorphous
		11	355.948	338.151	247.882	236.528	amorphous
		12	188.808	179.368	205.578	196.163	amorphous
		13	125.444	119.172	341.892	326.233	amorphous
		14	194.874	185.131	244.697	233.49	amorphous
		15	63.2825	60.1184	290.099	276.812	amorphous
		16	78.4846	74.5604	186.139	177.614	amorphous
		17	425.198	403.938	179.718	171.486	amorphous
		18	431.226	409.664	297.594	283.964	amorphous
		19	268.189	254.78	75.0409	71.6039	amorphous
		20	47.5856	45.2063	89.9513	85.8314	amorphous
		21	122.486	116.362	102.017	97.3441	amorphous
		22	173.152	164.494	167.281	159.62	amorphous
		23	373.471	354.797	299.414	285.7	amorphous
		24	28.5927	27.1631	291.009	277.681	amorphous
		25	40.4142	38.3935	68.1414	65.0204	amorphous
		26	94.3277	89.6113	169.777	162.001	amorphous
		27	299.821	284.83	208.063	198.533	amorphous
		28	335.177	318.418	175.04	167.023	amorphous
		29	299.235	284.274	247.058	235.742	amorphous
		30	214.995	204.246	238.392	227.473	amorphous
		31	256.12	243.314	137.595	131.293	amorphous
		32	148.825	141.384	179.495	171.274	amorphous
		33	340.728	323.692	54.6461	52.1432	amorphous
		34	102.873	97.7291	345.219	329.408	amorphous
		35	315.94	300.143	100.15	95.5635	amorphous
		36	100.543	95.5157	81.8649	78.1154	amorphous
		37	179.711	170.726	161.723	154.316	amorphous
		38	289.765	275.276	109.436	104.423	amorphous
		39	355.937	338.14	196.906	187.888	amorphous
		40	56.7218	53.8857	151.848	144.893	amorphous
		41	419.777	398.788	335.489	320.123	amorphous
		42	354.005	336.305	326.1	311.164	amorphous
		43	230.347	218.829	65.8031	62.7892	amorphous
		44	208.548	198.12	271.357	258.929	amorphous
		45	213.223	202.562	130.736	124.748	amorphous
		46	153.118	145.462	176.851	168.751	amorphous
		47	239.642	227.66	214.361	204.543	amorphous
		48	240.61	228.58	332.821	317.577	amorphous
		49	371.945	353.347	175.323	167.293	amorphous
		50	362.188	344.078	344.916	329.118	amorphous
		51	297.768	282.88	140.436	134.004	amorphous
		52	184.045	174.843	260.33	248.406	amorphous
		53	369.356	350.889	249.902	238.456	amorphous
		54	250.049	237.547	211.738	202.04	amorphous
		55	172.111	163.506	259.432	247.549	amorphous
		56	423.893	402.698	249.958	238.51	amorphous
		57	396.904	377.058	103.44	98.702	amorphous
		58	257.467	244.594	88.4043	84.3552	amorphous
		59	288.419	273.998	349.724	333.706	amorphous
		60	273.255	259.592	101.336	96.6949	amorphous
		61	110.914	105.368	59.7802	57.0422	amorphous
		62	150.933	143.387	218.36	208.359	amorphous
		63	223.555	212.377	314.56	300.153	amorphous
		64	120.649	114.616	250.753	239.268	amorphous
		65	383.364	364.196	107.13	102.223	amorphous
		66	105.359	100.091	160.675	153.316	amorphous
		67	118.695	112.76	188.218	179.597	amorphous
		68	95.063	90.3098	344.491	328.713	amorphous
		69	119.44	113.468	96.9215	92.4823	amorphous
		70	208.479	198.055	306.657	292.611	amorphous
		71	155.152	147.394	243.429	232.28	amorphous
		72	417.207	396.346	162.882	155.421	amorphous
		73	206.129	195.822	107.277	102.364	amorphous
		74	101.101	96.0463	178.476	170.301	amorphous
		75	409.289	388.825	194.607	185.693	amorphous
		76	441.332	419.266	86.1835	82.2362	amorphous
		77	209.836	199.344	226.852	216.462	amorphous
		78	69.559	66.081	117.856	112.458	amorphous
		79	132.452	125.829	165.386	157.811	amorphous
		80	196.932	187.085	224.896	214.595	amorphous
		81	276.615	262.785	125.542	119.792	amorphous
		82	134.227	127.515	137.132	130.851	amorphous
		83	280.017	266.016	235.127	224.358	amorphous
		84	326.4	310.08	129.584	123.649	amorphous
		85	116.908	111.062	297.313	283.696	amorphous
		86	72.2548	68.6421	344.799	329.007	amorphous
		87	148.977	141.528	269.075	256.751	amorphous
		88	158.437	150.515	153.163	146.148	amorphous
		89	203.543	193.366	225.221	214.905	amorphous
		90	239.363	227.395	82.3307	78.5598	amorphous
		91	58.6008	55.6708	321.892	307.149	amorphous
		92	134.342	127.625	313.896	299.519	amorphous
		93	364.834	346.593	295.328	281.802	amorphous
		94	34.5063	32.781	128.218	122.346	amorphous
		95	419.55	398.572	228.307	217.85	amorphous
		96	334.582	317.853	56.7538	54.1544	amorphous
		97	231.125	219.568	177.578	169.444	amorphous
		98	269.609	256.128	143.816	137.229	amorphous
		99	123.557	117.38	98.4454	93.9365	amorphous
		100	218.387	207.468	103.63	98.8835	amorphous
		101	434.202	412.492	176.866	168.765	amorphous
		102	256.033	243.231	78.2688	74.684	amorphous
		103	245.046	232.794	229.557	219.043	amorphous
		104	121.122	115.066	191.277	182.517	amorphous
		105	231.248	219.686	258.785	246.932	amorphous
		106	289.098	274.643	259.966	248.06	amorphous
		107	312.67	297.036	241.559	230.495	amorphous
		108	191.28	181.716	60.0812	57.3294	amorphous
		109	179.263	170.3	70.6418	67.4063	amorphous
		110	444.856	422.613	145.88	139.198	amorphous
		111	38.1522	36.2446	209.259	199.675	amorphous
		112	400.852	380.809	246.334	235.051	amorphous
		113	412.887	392.242	172.286	164.395	amorphous
		114	362.767	344.628	295.994	282.437	amorphous
		115	64.2489	61.0365	265.508	253.347	amorphous
		116	134.081	127.377	340.595	324.995	amorphous
		117	165.533	157.256	209.4	199.809	amorphous
		118	312.924	297.277	147.544	140.786	amorphous
		119	80.4447	76.4225	81.6888	77.9473	amorphous
		120	330.685	314.151	233.288	222.603	amorphous
		121	67.6941	64.3094	283.641	270.65	amorphous
		122	301.808	286.718	177.036	168.927	amorphous
		123	233.506	221.831	77.247	73.709	amorphous
		124	355.434	337.662	129.941	123.99	amorphous
		125	328.036	311.634	96.097	91.6956	amorphous
		126	598	568.1	595.98	568.683	Big sphere
		127	403.315	383.149	182.025	173.688	amorphous
		128	165.022	156.771	208.143	198.61	amorphous
		129	321.063	305.01	187.227	178.652	amorphous
		130	106.663	101.329	312.611	298.293	amorphous
		131	35.0715	33.3179	205.416	196.007	amorphous
		132	340.464	323.441	333.087	317.831	amorphous
		133	236.01	224.209	241.313	230.26	amorphous
		134	227.407	216.036	337.308	321.859	amorphous
		135	409.221	388.76	122.212	116.615	amorphous
		136	283.023	268.872	252.837	241.256	amorphous
		137	286.361	272.043	136.719	130.457	amorphous
		138	389.841	370.349	251.542	240.021	amorphous
		139	366.75	348.412	258.542	246.7	amorphous
		140	268.837	255.395	70.3978	67.1735	amorphous
		141	100.291	95.2763	126.437	120.646	amorphous
		142	124.691	118.456	117.212	111.844	amorphous
		143	401.427	381.356	250.35	238.883	amorphous
		144	34.2725	32.5589	303.318	289.425	amorphous
		145	231.678	220.094	153.339	146.316	amorphous
		146	93.8728	89.1792	284.156	271.141	amorphous
		147	440.875	418.832	252.6	241.03	amorphous
		148	587	557.65	589	562.023	Big Sphere
		149	236.202	224.392	230.651	220.087	amorphous
		150	223.626	212.445	166.031	158.427	amorphous
		Median	231.324	219.758	195.756	186.791
		Max	598	568.1	595.98	568.683
		Min	28.5927	27.1631	54.6461	52.1432
		Average	238.041	226.139	201.309	192.089
		STDV	124.542	118.314	95.1768	90.8176

## Sheet: Experimental set-ups
	Design of multifactorial experiment with 15 treatments testing aggregation of the diatom T. weissflogii with plastic microbeads									Conversions
				Concentration of algae, plastic microbeads, and sediments added per 1.15 L cyclinder						Microbead count
		Set up	Treatment #	Algae content (T. weissflogi) # of cells	Plastic content (in mg)	Estimated # of microbeads	Sediment content (in mg)			mg	# of Beads
		1	1	0	300	27585	0			10.8	993
			2	0	200	18390	0			100.008	9195.18
			3	0	100	9195	0			1000	91944.8
		2	4	869565	300	27585	0
			5	869565	200	18390	0
			6	869565	100	9195	0
			7	869565	0	0	0
		3	8	869565	50	13792.5	0			Microbead count
			9	869565	25	6896.25	0			1.15 L	1 ml	1 L
			10	869565	12.5	3448.12	0		300	27585	23.987	23987
			11	869565	0	0	0		200	18390	15.9913	15991.3
		4	12	869565	50	4597.5	150		100	9195	7.99565	7995.65
			13	869565	25	2298.75	150		50	4597.5	3.99783	3997.83
			14	869565	12.5	1149.38	150		25	2298.75	1.99891	1998.91
			15	869565	0	0	0		12.5	1149.38	0.999457	999.457
				Concentration of algae, plastic microbeads, and sediments added per 1L						Microbead concentration
		Set up	Treatment #	Algae content (T. weissflogi) # of cells	Plastic content (in mg)	Estimated # of microbeads	Sediment content (in mg)			1.15 L	1 ml	1 L
		1	1	0	261	24000	0			300	0.26087	260.87
			2	0	174	16000	0			200	0.173913	173.913
			3	0	87	8000	0			100	0.0869565	86.9565
		2	4	10 6	261	24000	0			50	0.0434783	43.4783
			5	10 6	174	16000	0			25	0.0217391	21.7391
			6	10 6	87	8000	0			12.5	0.0108696	10.8696
			7	10 6	0	0	0
		3	8	10 6	43	4000	0			Sediments
			9	10 6	22	2000	0			1.15 L	1 ml	1 L
			10	10 6	11	1000	0			150	0.130435	130.435
			11	10 6	0	0	0
		4	12	10 6	43	4000	130			Algal content
			13	10 6	22	2000	130			1.15 L	1 ml	1 L
			14	10 6	11	1000	130			1000000	869.565	869565
			15	10 6	0	0	0

## Sheet: Aggregate size set-up1
		Aggregate size distribution set-up 1
		Treatment 1						Treatment 2					Treatment 3
			300mg microbeads only					200mg microbeads only					100mg microbeads only
		Number	Length in Pixel		Length in µm		Number	Length in Pixel		Length in µm		Number	Length in Pixel		Length in µm
		1	69376	69.376	693.76		1	85024	85.024	850.24		1	101789	101.789	1017.89
Conversion:		2	156036	156.036	1560.36		2	60008	60.008	600.08		2	83433	83.433	834.33
Pixel	µm	3	80231	80.231	802.31		3	173980	173.98	1739.8		3	40237	40.237	402.37
50	500	4	46615	46.615	466.15		4	97329	97.329	973.29		4	84024	84.024	840.24
1	10	5	69123	69.123	691.23		5	95854	95.854	958.54		5	68478	68.478	684.78
		6	85276	85.276	852.76		6	72173	72.173	721.73		6	54095	54.095	540.95
		7	180025	180.025	1800.25		7	73017	73.017	730.17		7	74061	74.061	740.61
		8	175923	175.923	1759.23		8	57801	57.801	578.01		8	127142	127.142	1271.42
		9	58018	58.018	580.18		9	111306	111.306	1113.06		9	69771	69.771	697.71
		10	84865	84.865	848.65		10	80056	80.056	800.56		10	104809	104.809	1048.09
		11	61205	61.205	612.05		11	50010	50.01	500.1		11	73817	73.817	738.17
		12	105575	105.575	1055.75		12	62008	62.008	620.08		12	62201	62.201	622.01
		13	189842	189.842	1898.42		13	112622	112.622	1126.22		13	67720	67.72	677.2
		14	112450	112.45	1124.5		14	51010	51.01	510.1		14	94826	94.826	948.26
		15	131529	131.529	1315.29		15	142088	142.088	1420.88		15	58421	58.421	584.21
		16	114726	114.726	1147.26		16	91137	91.137	911.37		16	84155	84.155	841.55
		17	52402	52.402	524.02		17	110549	110.549	1105.49		17	86128	86.128	861.28
		18	43909	43.909	439.09		18	60083	60.083	600.83		18	70694	70.694	706.94
		19	40497	40.497	404.97		19	118224	118.224	1182.24		19	84214	84.214	842.14
		20	92136	92.136	921.36		20	103769	103.769	1037.69		20	39459	39.459	394.59
		21	80006	80.006	800.06		21	107614	107.614	1076.14		21	53235	53.235	532.35
		22	82765	82.765	827.65		22	210693	210.693	2106.93		22	99624	99.624	996.24
		23	64008	64.008	640.08		23	91022	91.022	910.22		23	82211	82.211	822.11
		24	37154	37.154	371.54		24	81566	81.566	815.66		24	84959	84.959	849.59
		25	204005	204.005	2040.05		25	50994	50.994	509.94		25	85586	85.586	855.86
		26	41195	41.195	411.95		26	80156	80.156	801.56		26	59008	59.008	590.08
		27	73246	73.246	732.46		27	115954	115.954	1159.54		27	45044	45.044	450.44
		28	95671	95.671	956.71		28	78772	78.772	787.72		28	83199	83.199	831.99
		29	72780	72.78	727.8		29	90134	90.134	901.34		29	76164	76.164	761.64
		30	68951	68.951	689.51		30	48010	48.01	480.1		30	54231	54.231	542.31
		31	90558	90.558	905.58		31	85475	85.475	854.75		31	54672	54.672	546.72
		32	68622	68.622	686.22		32	76922	76.922	769.22		32	87818	87.818	878.18
		33	130384	130.384	1303.84		33	58600	58.6	586		33	79404	79.404	794.04
		34	62626	62.626	626.26		34	74632	74.632	746.32		34	47011	47.011	470.11
		35	49051	49.051	490.51		35	128845	128.845	1288.45		35	75690	75.69	756.9
		36	107564	107.564	1075.64		36	85422	85.422	854.22		36	51614	51.614	516.14
		37	51264	51.264	512.64		37	97015	97.015	970.15		37	45177	45.177	451.77
		38	108894	108.894	1088.94		38	98112	98.112	981.12		38	59816	59.816	598.16
		39	64327	64.327	643.27		39	82280	82.28	822.8		39	35903	35.903	359.03
		40	102956	102.956	1029.56		40	60681	60.681	606.81		40	50249	50.249	502.49
		41	73007	73.007	730.07		41	115213	115.213	1152.13		41	42804	42.804	428.04
		42	96313	96.313	963.13		42	59464	59.464	594.64		42	49563	49.563	495.63
		43	172186	172.186	1721.86		43	87006	87.006	870.06		43	65966	65.966	659.66
		44	131674	131.674	1316.74		44	57280	57.28	572.8		44	44643	44.643	446.43
		45	112872	112.872	1128.72		45	55109	55.109	551.09		45	36056	36.056	360.56
		46	55902	55.902	559.02		46	108772	108.772	1087.72		46	54745	54.745	547.45
		47	43463	43.463	434.63		47	58830	58.83	588.3		47	66370	66.37	663.7
		48	92439	92.439	924.39		48	186094	186.094	1860.94		48	45486	45.486	454.86
		49	209073	209.073	2090.73		49	62298	62.298	622.98		49	121248	121.248	1212.48
		50	82462	82.462	824.62		50	55803	55.803	558.03		50	42804	42.804	428.04
		Average	93503.5	93.5035	935.035		Average	89136.3	89.1363	891.363		Average	68195.5	68.1955	681.955		Average across 3 different concentrations
		Min	37154	37.154	371.54		Min	48010	48.01	480.1		Min	35903	35.903	359.03		836.118
		Max	209073	209.073	2090.73		Max	210693	210.693	2106.93		Max	127142	127.142	1271.42		Stadard diviation across all aggregate sizes
		STDV	44604.8	44.6048	446.048		STDV	34736.4	34.7364	347.364		STDV	21787	21.787	217.87		364.696

[truncated: 13 more sheets: Aggregate size set-up 2, Aggregate size set-up 3, Aggregate size set-up 4, Aggregate size pure algae, Turbidity set-up 1, Turbidity set-up 2, Turbidity set-up 3, Turbidity set-up 4, Settling velocity algae, Settling velocity set-up 3, Settling velocity set-up 4, Summary settling velocity, Resuspension behaviour]
