# Supplementary material for: Plastic microbeads from cosmetic products: an experimental study of their hydrodynamic behaviour, vertical transport and resuspension in phytoplankton and sediment aggregates
Source: Oxford University Press journal article supplement (doi:10.1525/elementa.317), 2018-01-01

### Figure S1. Products 1–6

Pictures of products used in the current study. From left to right: Product 4; Product 2; Product 5; Product 3; Product 1; Product 6

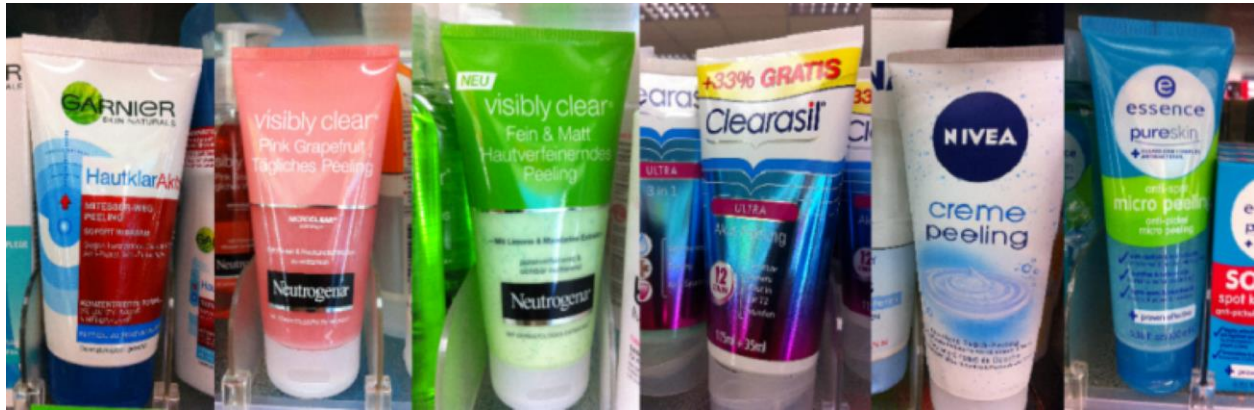

Supplement: elementa-6-317-s5.pdf [file elementa-6-317-s5.pdf]
